# Supplementary material for: Broad-Spectrum Antifungal, Biosurfactants and Bioemulsifier Activity of Bacillus subtilis subsp. spizizenii—A Potential Biocontrol and Bioremediation Agent in Agriculture
Source: MDPI journal article supplement (doi:10.3390/plants12061374), 2023-03-20
Supplement: s1 [file s1]

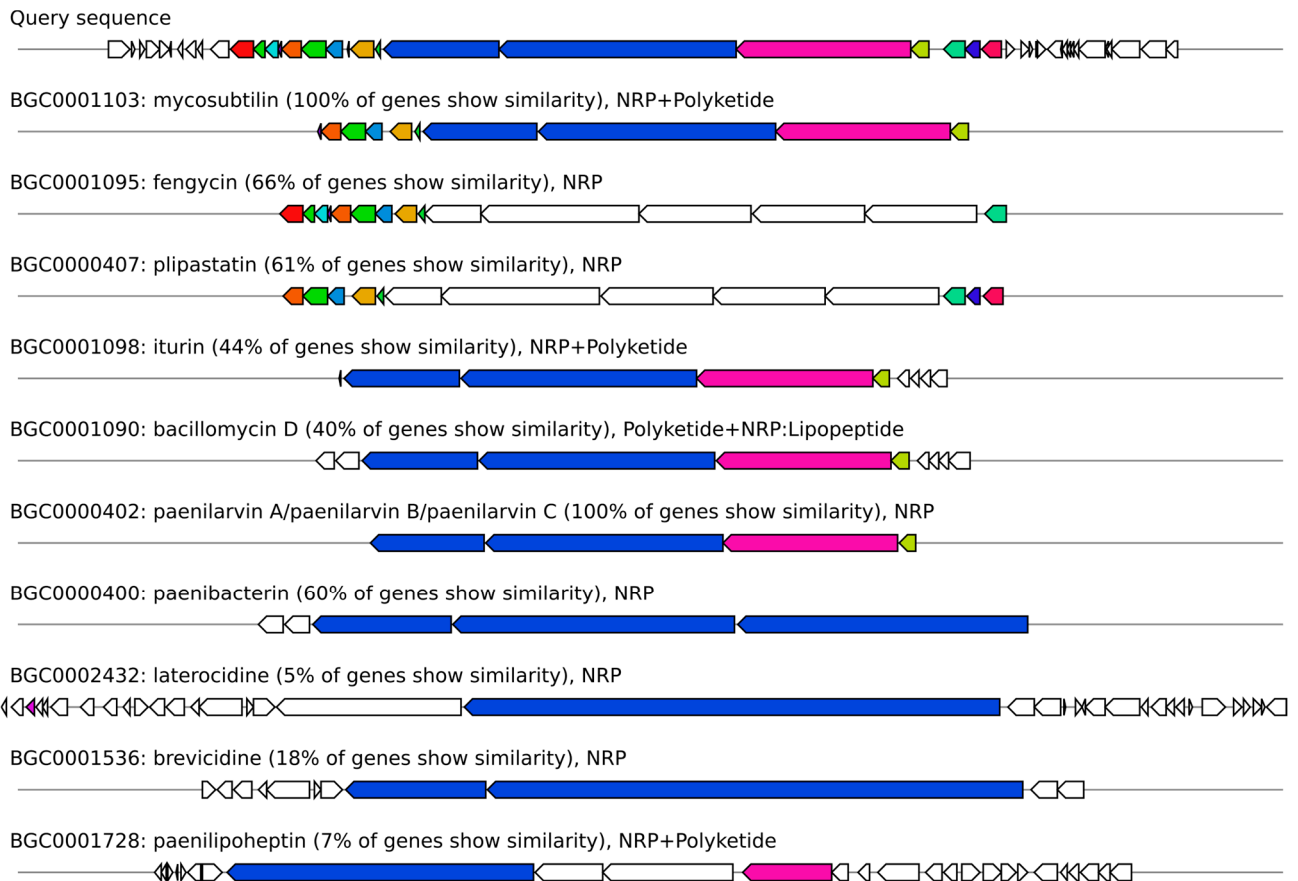

**Figure S1.** Comparison of *B. subtilis* subsp. *spizizenii* strain MC6B-22 showing percentage of genes matching known gene clusters for secondary metabolite biosynthesis. BLAST analysis and diagram was produced with antiSMASH 6.0 (<https://antismash.secondarymetabolites.org>).

**Table S1.** Primer and cycles for PCR amplification and lipopeptides biosynthesis genes in MC6B-22.

| Family Lipopeptide | Temperature cycling used °C/seg | Primer name | Sequence 5'-3'                     | Product length <sup>a</sup> | Reference |
|--------------------|---------------------------------|-------------|------------------------------------|-----------------------------|-----------|
| Surfactins         | 94/60<br>48/30<br>72/45         | As1-F       | CGCGGMTACCGVATYGAGC                | 0.42                        | [58]      |
|                    |                                 | Ts2-R       | ATBCCTTTBTWDGAATGTCCGCC            |                             |           |
| Mycosubtilins      | 94/60<br>48/30<br>72/45         | Am1-F       | CAKCARGTSAAAATYCGMGG               | 0.42                        |           |
|                    |                                 | Tm1-R       | CCDASATCAAARAADTTATC               |                             |           |
| Fengycins          | 94/30<br>48/30<br>72/30         | Af2-F       | GAATAYMTCCGGMCGTMTKGA              | 0.45                        |           |
|                    |                                 | Tf1-R       | GCTTTWADKGAATSBCCGCC               |                             |           |
| Plipastatins       | 94 30<br>50/30<br>72/90         | Ap1-F       | AGMCAGCKSGCMASATCMCC               | 0.90                        |           |
|                    |                                 | Tp1-R       | GCKATWWTGAARRCCGGCGG               |                             |           |
| Iturin             | 94/30<br>55/30<br>72/150        | ITUP1-F     | AGCTTAGGGAACAATTGTCATCGG<br>GGCTTC | 2.0                         | [86]      |
|                    |                                 | ITUP2-R     | TCAGATAGGCCGCCATATCGGAAT<br>GATTCG |                             |           |
| Bacillomycin D     | Various conditions were tested  | BACC1F      | GAAGGACACGGCAGAGAGTC               | 0.87                        | [87]      |
|                    |                                 | BACC1R      | CGCTGATGACTGTTTCATGCT              |                             |           |
| Kurstakins         | 94/60<br>40/30<br>72/45         | Aks-F       | TCHACWGGRAATCCAAAGGG               | 1.2                         | [88]      |
|                    |                                 | Tks-R       | CCACCDKTCAAACAARKWATC              |                             |           |
|                    |                                 | Tks-R       | CCACCDKTCAAACAARKWATC              |                             |           |
| 16s rDNA           | 95/30<br>53/30<br>72/60         | fD1         | AGAGTTTGATCCTGGCTCAG               | 1.5                         | [89]      |
|                    |                                 | rD1         | AAGGAGGTGATCCAGCC                  |                             |           |
| gyrB               | 94/30<br>60/30<br>72/120        | gyrBBAU P2  | GCGGAAGCGGCCNGSNATGTA              | ~1.5                        | [90]      |
|                    |                                 | gyrBBND N1  | CCGTCCACGTCGGCRTCNGYCAT            |                             |           |

<sup>a</sup> Kilo base pairs expected as reported at literature.

## References

86. Tsuge, K.; Inoue, S.; Ano, T.; Itaya, M.; Shoda, M. Horizontal transfer of iturin A operon, *itu*, to *Bacillus subtilis* 168 and conversion into an iturin A producer. *Antimicrob. Agents Chemother.* **2005**, *49*, 4641–4648.
87. Ramarathnam, R.; Bo, S.; Chen, Y.; Fernando, W.G.D.; Xuwen, G.; de Kievit, T. Molecular and biochemical detection of fengycin and bacillomycin D-producing *Bacillus* spp.; antagonistic to fungal pathogens of canola and wheat. *Can. J. Microbiol.* **2007**, *53*, 901–911.
88. Abderrahmani, A.; Tapi, A.; Nateche, F.; Chollet, M.; Leclère, V.; Wathelet, B.; Hacene, H.; Jacques, P. Bioinformatics and molecular approaches to detect NRPS genes involved in the biosynthesis of kurstakin from *Bacillus thuringiensis*. *Appl. Microbiol. Biotechnol.* **2011**, *92*, 571–581.
89. Weisburg, W.G.; Barns, S.M.; Pelletier, D.A.; Lane, D.J. 16s ribosomal DNA amplification for phylogenetic study. *J. Bacteriol.* **1999**, *173*, 697–703.
90. Santos, S.R.; Ochman, H. Identification and phylogenetic sorting of bacterial lineages with universally conserved genes and proteins. *Environ. Microbiol.* **2014**, *6*, 754–759.
